# Supplementary material
Source: PubMed Central journal article supplement (PMC8422355)
Supplement: NIHMS370643-supplement-1.pdf [file NIHMS370643-supplement-1.pdf]

Supplemental Table 1. Comparison of bone mineral characteristics at the distal femoral metaphysis from the contralateral limbs of animals undergoing ovariectomy (OVX) + hindlimb unloading (HLU) + reambulation (REAMB) + exercise (EX).

|             | Total      |                    |                       | Trabecular |                    |                       | Cortical  |                    |                       |
|-------------|------------|--------------------|-----------------------|------------|--------------------|-----------------------|-----------|--------------------|-----------------------|
|             | BMC        | Bone Area          | BMD                   | BMC        | Bone Area          | BMD                   | BMC       | Bone Area          | BMD                   |
|             | (mg/mm)    | (mm <sup>2</sup> ) | (mg/cm <sup>3</sup> ) | (mg/mm)    | (mm <sup>2</sup> ) | (mg/cm <sup>3</sup> ) | (mg/mm)   | (mm <sup>2</sup> ) | (mg/cm <sup>3</sup> ) |
| Left Femur  | 9.9 ± 0.5  | 23.2 ± 0.8         | 427 ± 17              | 0.3 ± 0.1  | 6.9 ± 0.2          | 44 ± 10               | 5.4 ± 0.3 | 6.2 ± 0.3          | 870 ± 10              |
| Right Femur | 10.4 ± 0.8 | 22.7 ± 1.1         | 457 ± 25              | 0.6 ± 0.2  | 6.8 ± 0.3          | 88 ± 27               | 5.5 ± 0.4 | 6.3 ± 0.4          | 882 ± 10              |

Values are Means ± SEM from OVX+HLU+REAMB+EX animals, n = 9 bones per side. No significant differences were present between left and right limb for any measure. BMC = Bone mineral content, BMD = bone mineral density.

Supplementary Table 2. Body Mass At Baseline and Sacrifice.

| Group          | Body Mass (g) |                       |
|----------------|---------------|-----------------------|
|                | Baseline      | Sacrifice             |
| Intact Control | (a) 270 ± 15  | 296 ± 15              |
| OVX            | (b) 280 ± 24  | 343 ± 45 <sup>#</sup> |

|                                  |     |          |                       |
|----------------------------------|-----|----------|-----------------------|
| OVX+E <sub>2</sub>               | (c) | 267 ± 20 | 255 ± 18              |
| OVX+HLU                          | (d) | 280 ± 17 | 298 ± 26              |
| OVX+E <sub>2</sub> +HLU          | (e) | 263 ± 12 | 257 ± 24              |
| OVX+HLU+REAMB                    | (f) | 277 ± 17 | 325 ± 14 <sup>#</sup> |
| OVX+E <sub>2</sub> +HLU+REAMB    | (g) | 263 ± 9  | 294 ± 47              |
| OVX+HLU+REAMB+EX                 | (h) | 287 ± 23 | 312 ± 32              |
| OVX+E <sub>2</sub> +HLU+REAMB+EX | (i) | 281 ± 21 | 286 ± 23              |

---

Values are Means ± SEM of 6-12/group. No differences were present

between groups at baseline or sacrifice. # indicates within group change

from baseline to sacrifice was significantly different at  $p \leq 0.05$ .
